# Supplementary material for: Causal associations between thyroid dysfunction and COVID-19 susceptibility and severity: A bidirectional Mendelian randomization study
Source: Front Endocrinol (Lausanne). 2022 Sep 6;13:961717. doi: 10.3389/fendo.2022.961717 (PMC9485491; doi:10.3389/fendo.2022.961717)
Supplement: Supplementary file 2 [file Table_1.xlsx]

## Sheet: Hyperthyroidism SNP
Exposure	SNP	effect_allele.exposure	other_allele.exposure	eaf.exposure	beta.exposure	se.exposure	pval.exposure	R2	F	beta.susceptibility	se.susceptibility	pval.susceptibility	beta.hospitalization	se.hospitalization	pval.hospitalization	beta.very severe	se.very severe	pval.very severe
Hyperthyroidism	rs12410532	T	C	0.1667	0.2288	0.0396	7.48e-09	0.0145438	33.3827	-0.0010817	0.013146	0.9344	-0.037152	0.025279	0.1417	-0.033229	0.036205	0.3587
Hyperthyroidism	rs1479560	T	G	0.3516	0.2569	0.0425	1.46e-09	0.0300919	36.5385	0.012168	0.01324	0.3581	-0.0030624	0.025883	0.9058	0.0064009	0.037681	0.8651
Hyperthyroidism	rs17477923	T	C	0.8274	-0.2447	0.034	6.12e-13	0.0171023	51.7977	0.0048478	0.011609	0.6763	0.021451	0.023496	0.3613	0.011962	0.038975	0.7589
Hyperthyroidism	rs2983514	A	G	0.7152	-0.1992	0.0321	5.24e-10	0.016165	38.5096	0.011221	0.010424	0.2817	0.017897	0.021721	0.41	0.059507	0.035556	0.09421
Hyperthyroidism	rs66760320	T	C	0.2605	0.1924	0.0351	4.43e-08	0.0142622	30.0466	0.0054115	0.011131	0.6269	0.011289	0.021022	0.5913	0.029218	0.030295	0.3348
Hyperthyroidism	rs77148314	A	G	0.01282	0.5431	0.0993	4.55e-08	0.00746576	29.9131	-0.025332	0.027526	0.3574	-0.028874	0.053982	0.5927	-0.045644	0.080136	0.569
Hyperthyroidism	rs8077245	T	G	0.7532	0.2054	0.033	5.02e-10	0.0156851	38.7412	-0.0075342	0.0098282	0.4433	-0.041552	0.020579	0.04347	-0.068391	0.03428	0.04603
Hyperthyroidism	rs925488	A	G	0.7743	0.1903	0.0333	1.14e-08	0.0126575	32.658	-0.0062376	0.0099188	0.5294	0.0068967	0.019275	0.7205	-0.0052205	0.02783	0.8512
								Sum R2=0.128	Mean F=36.4

## Sheet: Hypothyroidism SNP
Exposure	SNP	effect_allele.exposure	other_allele.exposure	eaf.exposure	beta.exposure	se.exposure	pval.exposure	R2	F	beta.susceptibility	se.susceptibility	pval.susceptibility	beta.hospitalization	se.hospitalization	pval.hospitalization	beta.very severe	se.very severe	pval.very severe
Hypothyroidism	rs11675342	T	C	0.3988	0.1604	0.025	1.48e-10	0.0123371	41.1651	-0.01238	0.0095294	0.1939	-0.014999	0.018495	0.4174	-0.026384	0.026774	0.3244
Hypothyroidism	rs12449792	T	C	0.3168	0.1566	0.0281	2.41e-08	0.0106156	31.0578	-0.0078885	0.010191	0.4389	-0.02662	0.021595	0.2177	-0.045486	0.03485	0.1918
Hypothyroidism	rs143344027	A	G	0.9881	-0.5314	0.0827	1.33e-10	0.00669594	41.2888	0.030697	0.033139	0.3543	-0.13707	0.06875	0.04617	-0.065567	0.11664	0.574
Hypothyroidism	rs2983514	A	G	0.7152	0.1541	0.0273	1.58e-08	0.00967801	31.8625	0.011221	0.010424	0.2817	0.017897	0.021721	0.41	0.059507	0.035556	0.09421
Hypothyroidism	rs597808	A	G	0.2253	0.1801	0.0259	3.47e-12	0.0113228	48.3535	-0.0069989	0.0098902	0.4792	-0.028131	0.020621	0.1725	-0.063301	0.034298	0.06495
Hypothyroidism	rs75491569	T	C	0.1777	-0.2384	0.0367	8.67e-11	0.0166096	42.1969	-0.0014856	0.013103	0.9097	-0.036743	0.02523	0.1453	-0.030896	0.036159	0.3929
Hypothyroidism	rs78495697	T	C	0.1424	0.3157	0.0414	2.56e-14	0.024343	58.1498	-0.013171	0.016738	0.4313	-0.054811	0.033297	0.09974	-0.10942	0.051482	0.03356
								Sum R2=0.092	Mean F=42.0

## Sheet: COVID-19 susceptibility SNP
Exposure	SNP	effect_allele.exposure	other_allele.exposure	eaf.exposure	beta.exposure	se.exposure	pval.exposure	R2	F	beta.Hyperthyroidism	se.Hyperthyroidism	pval.Hyperthyroidism	beta.Hypothyroidism	se.Hypothyroidism	pval.Hypothyroidism
COVID-19 susceptibility	rs10744789	C	T	0.7152	0.065121	0.010314	2.723e-10	0.00172832	39.8646	-0.0186	0.033	0.5723	-0.0104	0.0272	0.7026
COVID-19 susceptibility	rs10936744	T	C	0.3588	-0.062641	0.0099836	3.511e-10	0.00180548	39.368	-0.0123	0.0338	0.7153	0.0161	0.0264	0.5431
COVID-19 susceptibility	rs2271616	T	G	0.1181	0.15634	0.015084	3.608e-25	0.00509143	107.425	0.0806	0.0563	0.1521	0.0255	0.0531	0.6319
COVID-19 susceptibility	rs35508621	C	T	0.08344	0.16524	0.017116	4.722e-22	0.00417634	93.2021	0.1069	0.0574	0.0625	0.1032	0.0469	0.02762
COVID-19 susceptibility	rs4971066	G	T	0.1777	-0.076762	0.0134	1.015e-08	0.00172203	32.8158	0.0683	0.045	0.1293	0.0062	0.0353	0.8616
COVID-19 susceptibility	rs579459	T	C	0.7899	-0.094142	0.011465	2.183e-16	0.00294065	67.4247	0.0876	0.039	0.02478	-0.0965	0.0299	0.001248
COVID-19 susceptibility	rs8176686	C	T	0.451	-0.075229	0.011996	3.581e-10	0.00280252	39.3276	0.0309	0.0318	0.3304	-0.076	0.0254	0.002819
								Sum R2=0.020	Mean F=59.9

## Sheet: COVID-19 hospitalization SNP
Exposure	SNP	effect_allele.exposure	other_allele.exposure	eaf.exposure	beta.exposure	se.exposure	pval.exposure	R2	F	beta.Hyperthyroidism	se.Hyperthyroidism	pval.Hyperthyroidism	beta.Hypothyroidism	se.Hypothyroidism	pval.Hypothyroidism
COVID-19 hospitalization	rs13050728	C	T	0.6528	-0.16832	0.020183	7.437e-17	0.0128394	69.5505	-0.0424	0.0345	0.2189	-0.0206	0.0275	0.4542
COVID-19 hospitalization	rs2109069	A	G	0.3227	0.15131	0.019906	2.937e-14	0.010008	57.7786	-0.0069	0.0411	0.8662	0.0325	0.0314	0.3007
COVID-19 hospitalization	rs2660	A	G	0.6902	0.11639	0.019406	2.005e-09	0.00579525	35.9716	-0.0444	0.0327	0.1745	-0.0094	0.027	0.7291
COVID-19 hospitalization	rs35081325	T	A	0.08122	0.48825	0.031508	3.684e-54	0.0355786	240.128	0.1105	0.0576	0.05496	0.1047	0.0471	0.02629
COVID-19 hospitalization	rs622568	C	A	0.1512	0.15355	0.026026	3.644e-09	0.00605183	34.8085	-0.0033	0.0436	0.9402	-0.0142	0.0338	0.6756
								Sum R2=0.071	Mean F=87.6

## Sheet: COVID-19 very severe SNP
Exposure	SNP	effect_allele.exposure	other_allele.exposure	eaf.exposure	beta.exposure	se.exposure	pval.exposure	R2	F	beta.Hyperthyroidism	se.Hyperthyroidism	pval.Hyperthyroidism	beta.Hypothyroidism	se.Hypothyroidism	pval.Hypothyroidism
COVID-19 severity	rs11085727	T	C	0.2811	0.1727	0.029295	3.738e-09	0.0120544	34.7534	0.0153	0.0369	0.6789	-0.0459	0.0293	0.1175
COVID-19 severity	rs111837807	C	T	0.0996	0.29453	0.04276	5.656e-12	0.0155591	47.4443	0.0015	0.0533	0.9771	0.1613	0.0464	0.0005137
COVID-19 severity	rs13050728	C	T	0.6627	-0.20011	0.028559	2.437e-12	0.0197041	49.0966	-0.0424	0.0345	0.2189	-0.0206	0.0275	0.4542
COVID-19 severity	rs2109069	A	G	0.3287	0.25663	0.02807	6.115e-20	0.0290644	83.5853	-0.0069	0.0411	0.8662	0.0325	0.0314	0.3007
COVID-19 severity	rs35081325	T	A	0.07529	0.62617	0.044502	5.754e-45	0.0545956	197.982	0.1105	0.0576	0.05496	0.1047	0.0471	0.02629
COVID-19 severity	rs622568	C	A	0.1463	0.22629	0.037082	1.044e-09	0.0127912	37.2396	-0.0033	0.0436	0.9402	-0.0142	0.0338	0.6756
COVID-19 severity	rs7135260	C	T	0.6742	0.19247	0.027983	6.054e-12	0.0181166	47.3083	-0.0397	0.033	0.2288	-0.0119	0.0272	0.6608
COVID-19 severity	rs77534576	T	C	0.03465	0.45975	0.074941	8.525e-10	0.0141404	37.6361	-0.0009	0.1111	0.9937	-0.0222	0.0809	0.7833
								Sum R2=0.176	Mean F=66.9
